# Supplementary material for: Why Did All Patients with Atrial Fibrillation and High Risk of Stroke Not Receive Oral Anticoagulants? Results of the Polish Atrial Fibrillation (POL-AF) Registry
Source: MDPI journal article supplement (doi:10.3390/jcm10194611), 2021-10-08
Supplement: s1 [file s1]

**Table S1.** Factors associated with the selection of an OAC over no OAC for stroke prevention in patients with AF: univariable logistic regression models.

| Factors                                      | OAC/No OAC |            |          |
|----------------------------------------------|------------|------------|----------|
|                                              | OR         | 95%CI      | <i>p</i> |
| Age                                          | 0.98       | 0.97–0.99  | 0.001    |
| Female                                       | 0.90       | 0.71–1.14  | 0.402    |
| <b>Type of atrial fibrillation</b>           |            |            |          |
| Paroxysmal AF                                | 0.90       | 0.71–1.14  | 0.393    |
| Persistent AF                                | 1.84       | 1.32–2.56  | <0.001   |
| <b>Medical history</b>                       |            |            |          |
| Hypertension                                 | 1.53       | 1.1–2.10   | 0.009    |
| Heart failure                                | 0.96       | 0.74–1.24  | 0.748    |
| Vascular disease                             | 0.81       | 0.63–1.03  | 0.090    |
| Coronary artery disease                      | 0.81       | 0.61–1.03  | 0.097    |
| Previous myocardial infarction               | 0.65       | 0.51–0.84  | 0.001    |
| Peripheral artery disease                    | 0.68       | 0.51–0.91  | 0.009    |
| Previous stroke/TIA/peripheral embolism      | 0.33       | 0.21–0.52  | <0.001   |
| Diabetes mellitus                            | 0.88       | 0.69–1.11  | 0.283    |
| Any previous bleeding                        | 0.21       | 0.14–0.31  | <0.001   |
| Previous intracranial bleeding               | 0.15       | 0.07–0.32  | <0.001   |
| Cancer                                       | 0.35       | 0.24–0.51  | <0.001   |
| Hemoglobin <12 g/dL                          | 0.48       | 0.38–0.61  | <0.001   |
| eGFR < 60 mL/min/1.73 m <sup>2</sup>         | 0.69       | 0.54–0.87  | 0.002    |
| CHA <sub>2</sub> DS <sub>2</sub> -VASc score | 0.97       | 0.90–1.05  | 0.455    |
| HAS-BLED score                               | 0.83       | 0.73–0.96  | 0.009    |
| <b>Reason for hospitalization</b>            |            |            |          |
| Electrical cardioversion                     | 7.67       | 4.28–13.73 | <0.001   |
| Planned coronarography/ PCI                  | 0.92       | 0.63–1.33  | 0.653    |
| Planned CIED implantation/reimplantation     | 1.89       | 1.14–3.13  | 0.013    |
| Acute coronary syndrome                      | 0.39       | 0.27–0.56  | <0.001   |
| Heart failure                                | 0.87       | 0.66–1.15  | 0.323    |
| Ablation other than AF                       | 0.94       | 0.56–1.57  | 0.811    |
| AF without any procedures                    | 1.55       | 0.84–2.89  | 0.163    |

Abbreviation: AF, atrial fibrillation; CIED, cardiac implantable electronic device; eGFR, estimated glomerular filtration rate; IQR, interquartile range; OAC, oral anticoagulant; PCI, percutaneous coronary intervention; SD, standard deviation, TIA, transient ischemic attack. CHA<sub>2</sub>DS<sub>2</sub>-VASc score: congestive heart failure (1 point), hypertension (1 point), age ≥ 75 years (2 points), diabetes mellitus (1 point), stroke/TIA/thromboembolism (2 points), vascular disease (1 point), age 65–74 years (1 point), female sex (1 point). HAS-BLED score: hypertension (1 point), liver disease (1 point), renal disease (1 point), stroke history (1 point), bleeding history (1 point), labile INR, age > 65 years (1 point), drug (concomitant use of NSAID or antiplatelet agent, 1 point).
